# Supplementary material for: An invasive zone in human liver cancer identified by Stereo-seq promotes hepatocyte–tumor cell crosstalk, local immunosuppression and tumor progression
Source: Springer Nature journal article supplement (doi:10.1038/s41422-023-00831-1), 2023-06-19
Supplement: MOESM10 [file 41422_2023_831_MOESM10_ESM.pdf]

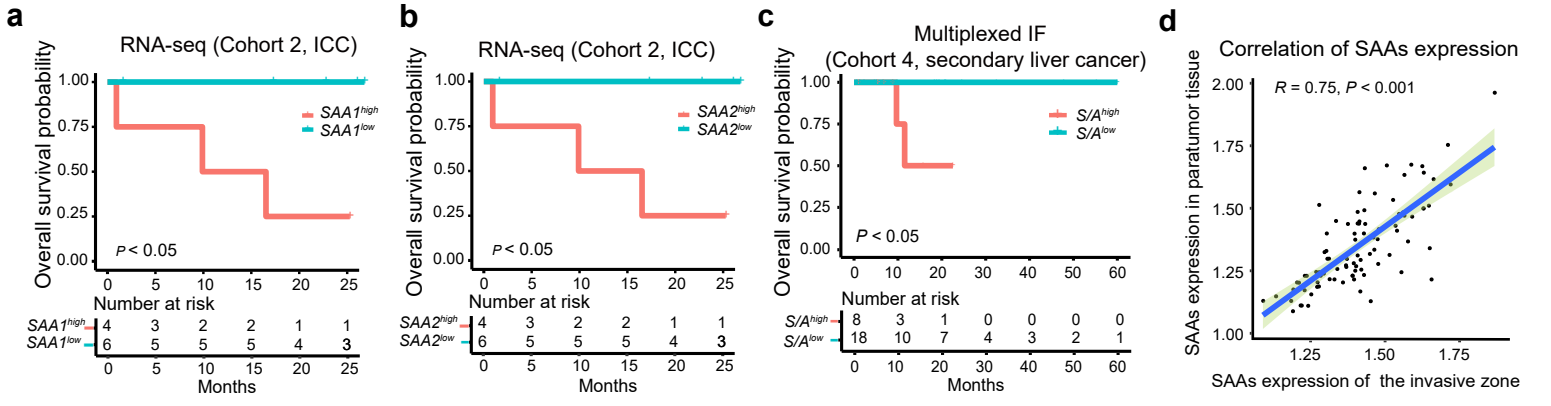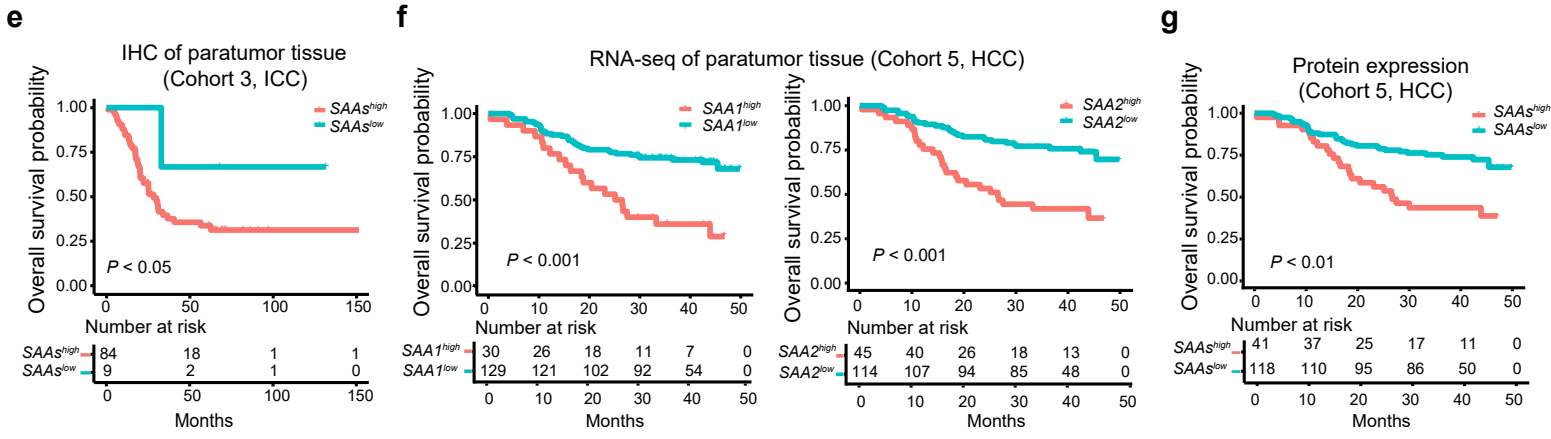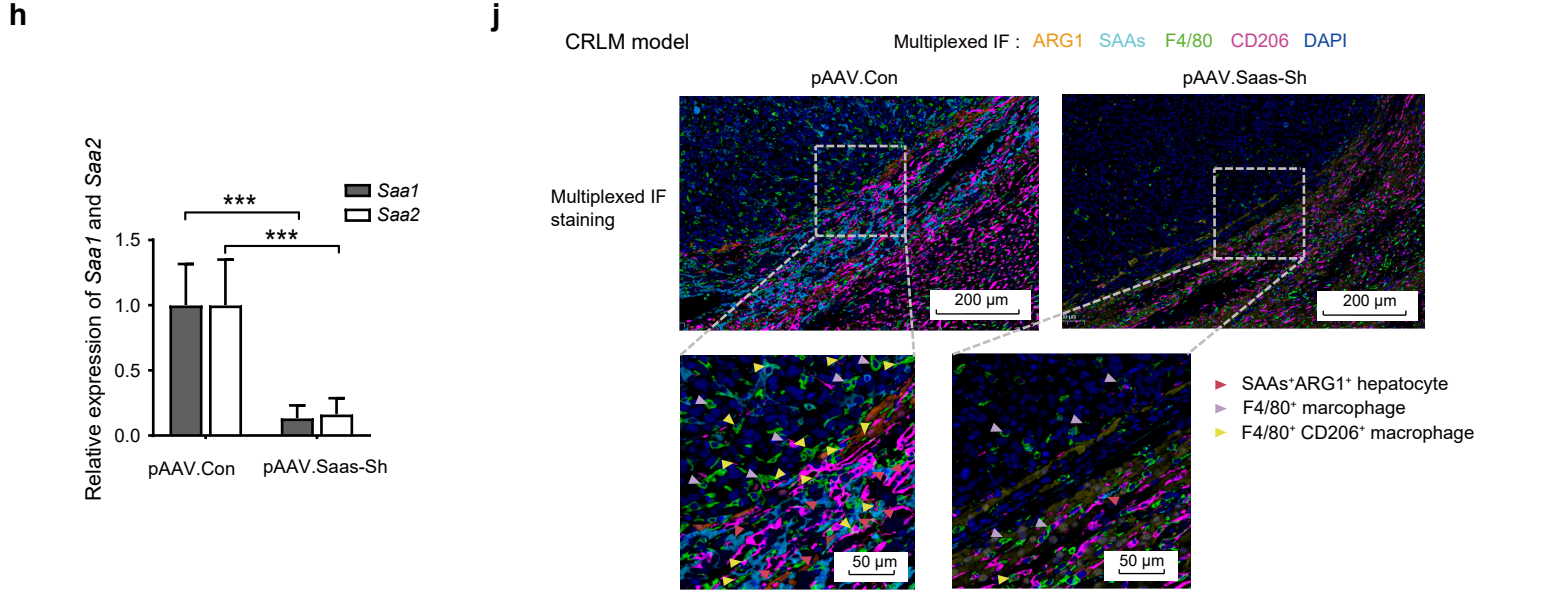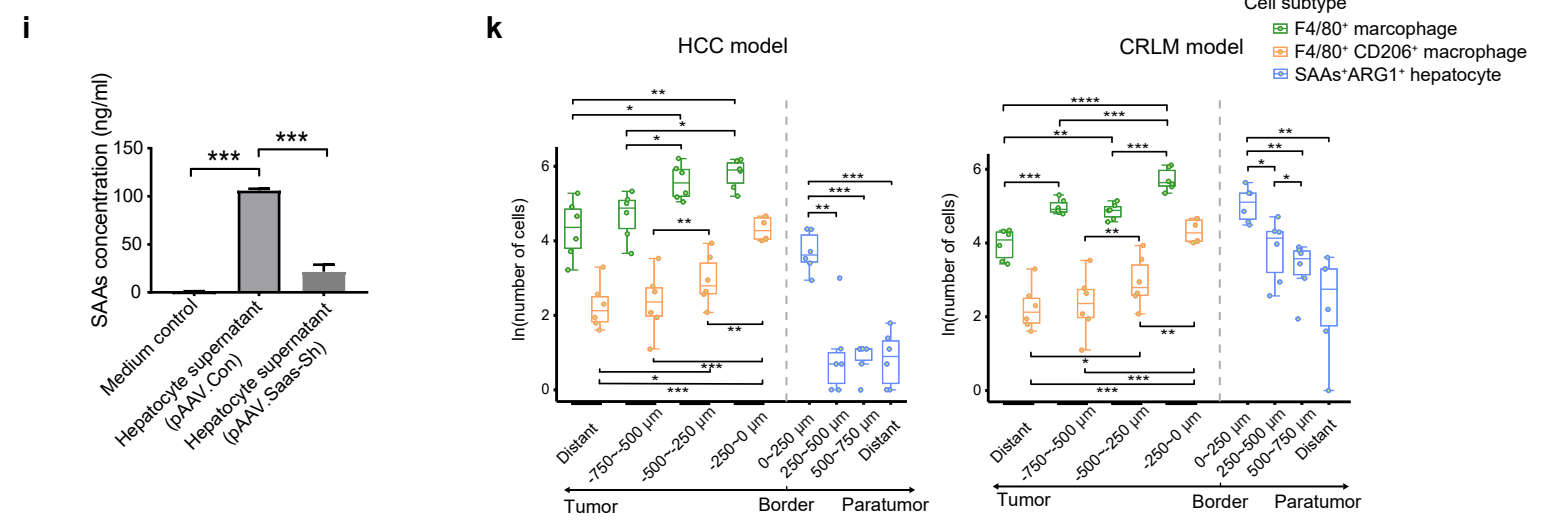

**Supplementary information, Fig. S10. High SAAs expression in damaged hepatocytes in the invasive zone correlates with a poor prognosis in patients with liver cancer. (a-b)** Overall survival (OS) curves of 10 patients with ICC from Validation Cohort 2 grouped by the *SAA1* a. or *SAA2* b. expression level in margin areas based on the bulk RNA-seq data. **c.** OS curves of 26 patients with secondary liver cancer from Validation Cohort 4 grouped based on the SAAs/ARG1 ratio determined using multiplexed IF staining. **d.** Scatter diagram showing the correlations between the SAAs expression levels in the invasive zone and paratumor tissues determined by IHC staining in 93 ICC patients from Validation Cohort 3. **e.** OS curves of 93 patients with ICC from Validation Cohort 3, grouped by their relative expression levels of SAAs in paratumor tissues as determined by IHC staining. **f.** OS curves of 159 patients with HCC from Validation Cohort 5, grouped by the relative expression levels of *SAA1* and *SAA2* in the paratumor tissues as indicated by RNA-seq data. **g.** OS curves of 159 patients with HCC from Validation Cohort 5, grouped by their relative expression levels of SAAs in paratumor tissues based on proteomic data. **h.** Relative transcriptional expression levels of SAAs in the liver tissues of mice in pAAV9-Con group or pAAV9-*Saas*-Sh group. **i.** Secreted SAAs protein levels measured by mouse SAAs enzyme-linked immunosorbent assay (ELISA) kit in the supernatant of murine primary hepatocytes cultured for 12 hours of mice in pAAV9-Con group and pAAV9-*Saas*-Sh group. **j.** Multiplexed IF staining images shows the tumor ecosystem including hepatocyte (ARG1), SAAs<sup>+</sup> hepatocyte, macrophage (F4/80) and M2 macrophage (F4/80<sup>+</sup>CD206<sup>+</sup> cells) in invasion zone from mouse CRLM model **k.** Quantification of macrophages, M2 macrophages and SAAs<sup>+</sup> hepatocytes in different layers of the invasive zone (1000  $\mu$ m in normal length) from HCC models and CRLM models. The Log-rank test was used to analyze the data in panels **a-c**, **e-g**. Student's *t*-test was used to analyze the data in panel **h** and **k**. \* represents  $P < 0.05$ ; \*\*, represents  $P < 0.01$ ; \*\*\*, represents  $P < 0.001$ .
